# Supplementary material
Source: publisher figshare collection journal article supplement (https://acs.figshare.com/ndownloader/files/5136940)
Supplement: Supplementary file 1 [file 5136940]

**Heteroepitaxial Nucleation and Oriented Growth of Manganese Oxide Islands on  
Carbonate Minerals under Aqueous Conditions**

Young-Shin Jun, Treavor A. Kendall, Scot T. Martin\*,  
Cynthia M. Friend, and Joost J. Vlassak

**Supporting Information:**

1 Page

1 Figure

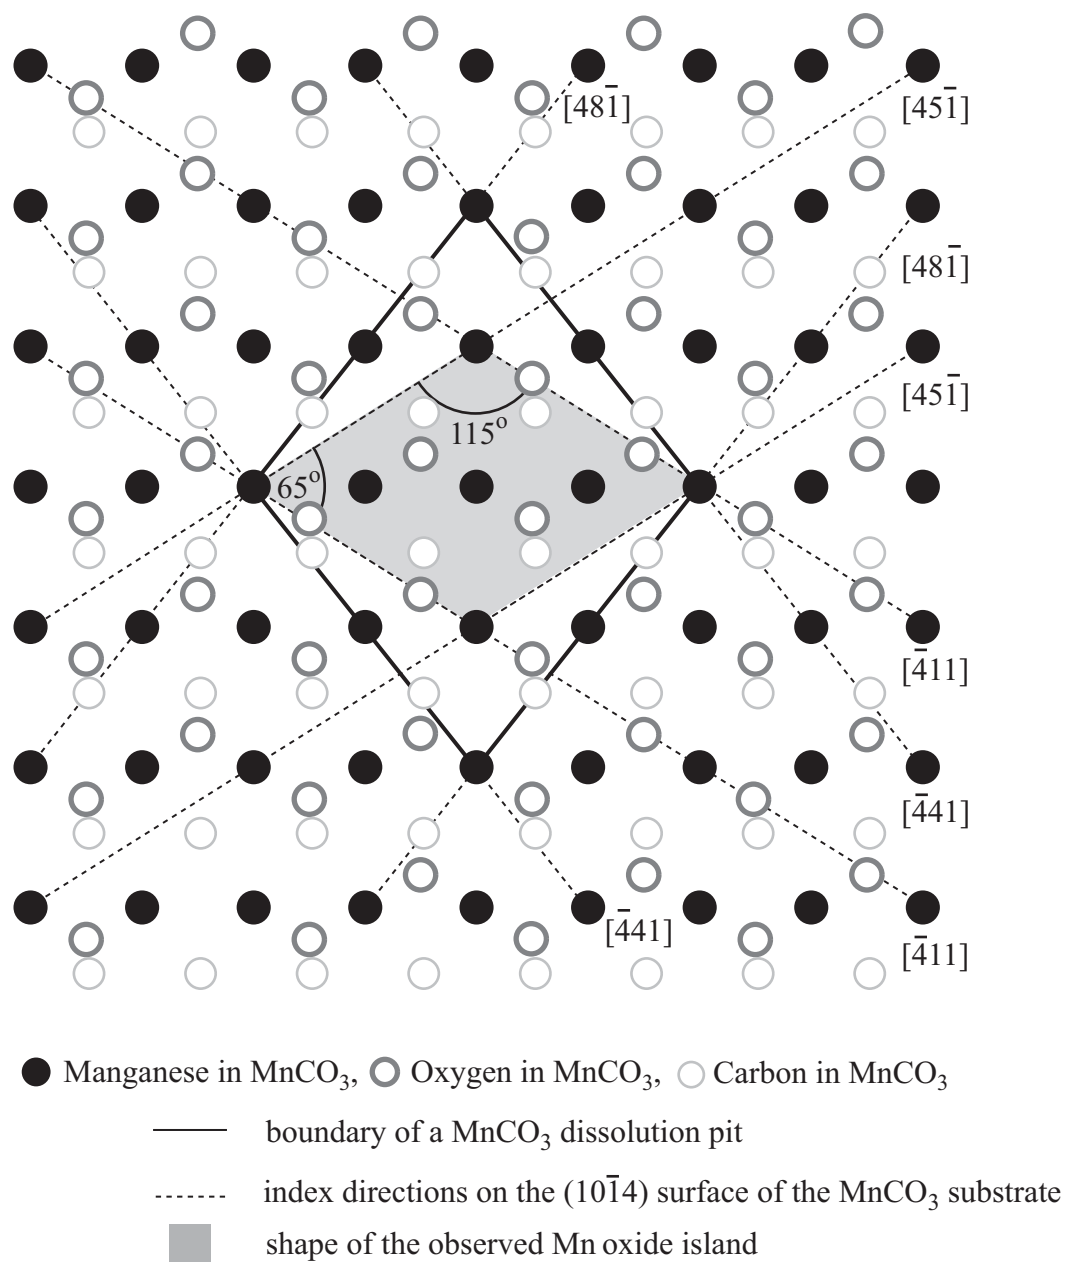

Figure S1. Hypothesized positioning of the Mn oxide island on an unreconstructed  $(10\bar{1}4)$   $\text{MnCO}_3$  surface. Each line shows an index direction on the  $(10\bar{1}4)$  surface of  $\text{MnCO}_3$ . The island edges are parallel to the  $[45\bar{1}]$  and  $[\bar{4}11]$  directions of the substrate. The intersection of the  $[45\bar{1}]$  and  $[\bar{4}11]$  directions creates  $65^\circ$  and  $115^\circ$  angles, which are similar to the inner angles (viz.  $68^\circ$  and  $112^\circ$  angles) of the observed Mn oxide islands.
